# Supplementary material
Source: PubMed Central journal article supplement (PMC7307779)

**A**

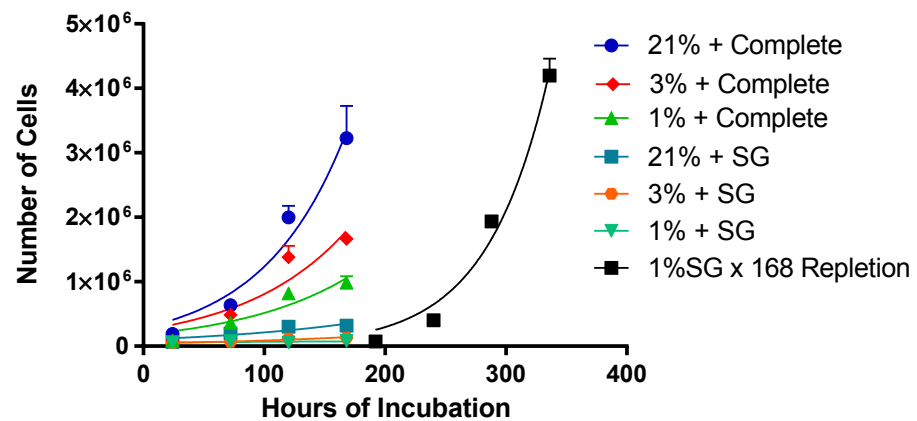

**B**

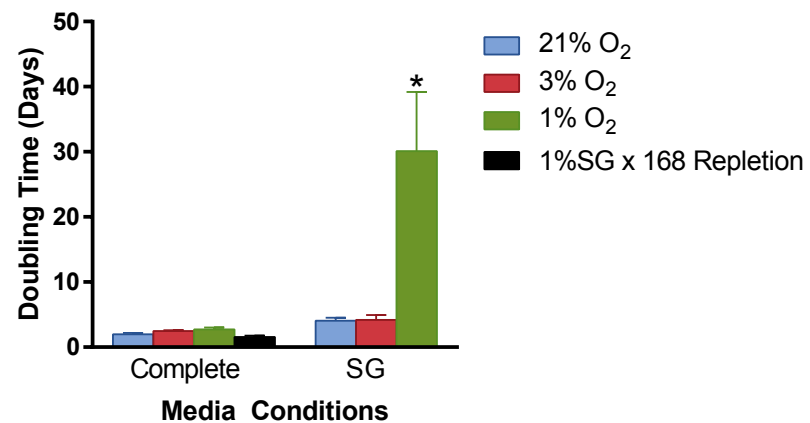

**C**

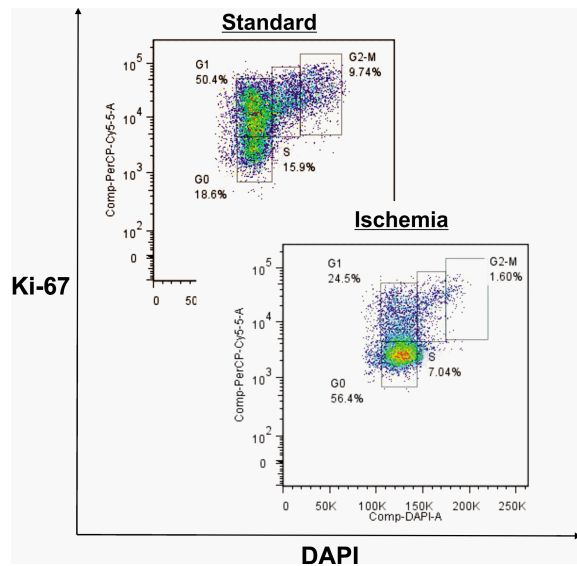

**D**

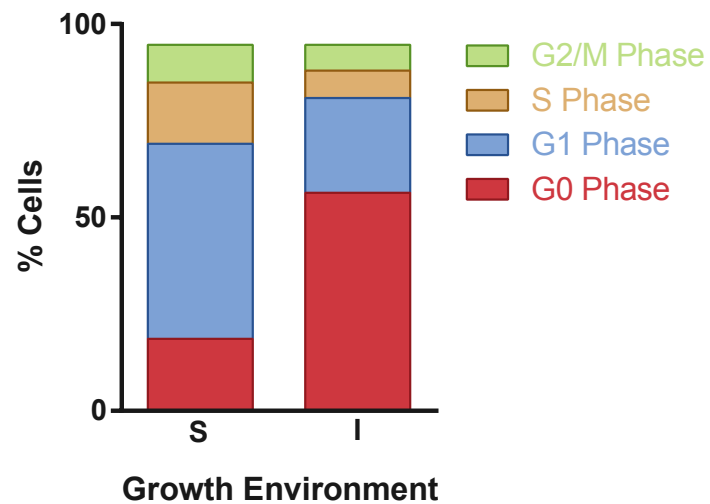

**E**

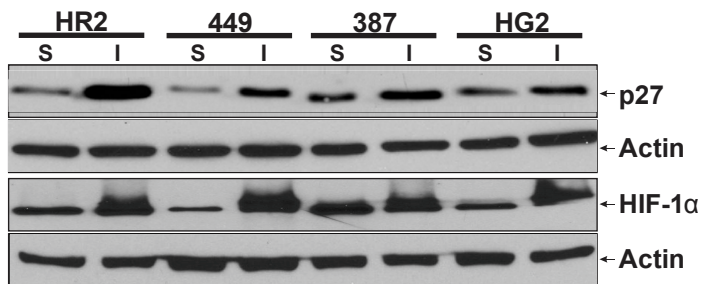

Supplement: NIHMS1587206-supplement-Supplementary_Figure_1.pdf [file NIHMS1587206-supplement-Supplementary_Figure_1.pdf]
